# Supplementary material for: Influence of FOSL1 Inhibition on Vascular Calcification and ROS Generation through Ferroptosis via P53-SLC7A11 Axis
Source: MDPI journal article supplement (doi:10.3390/biomedicines11020635), 2023-02-20
Supplement: s1 [file s1]

**S1**

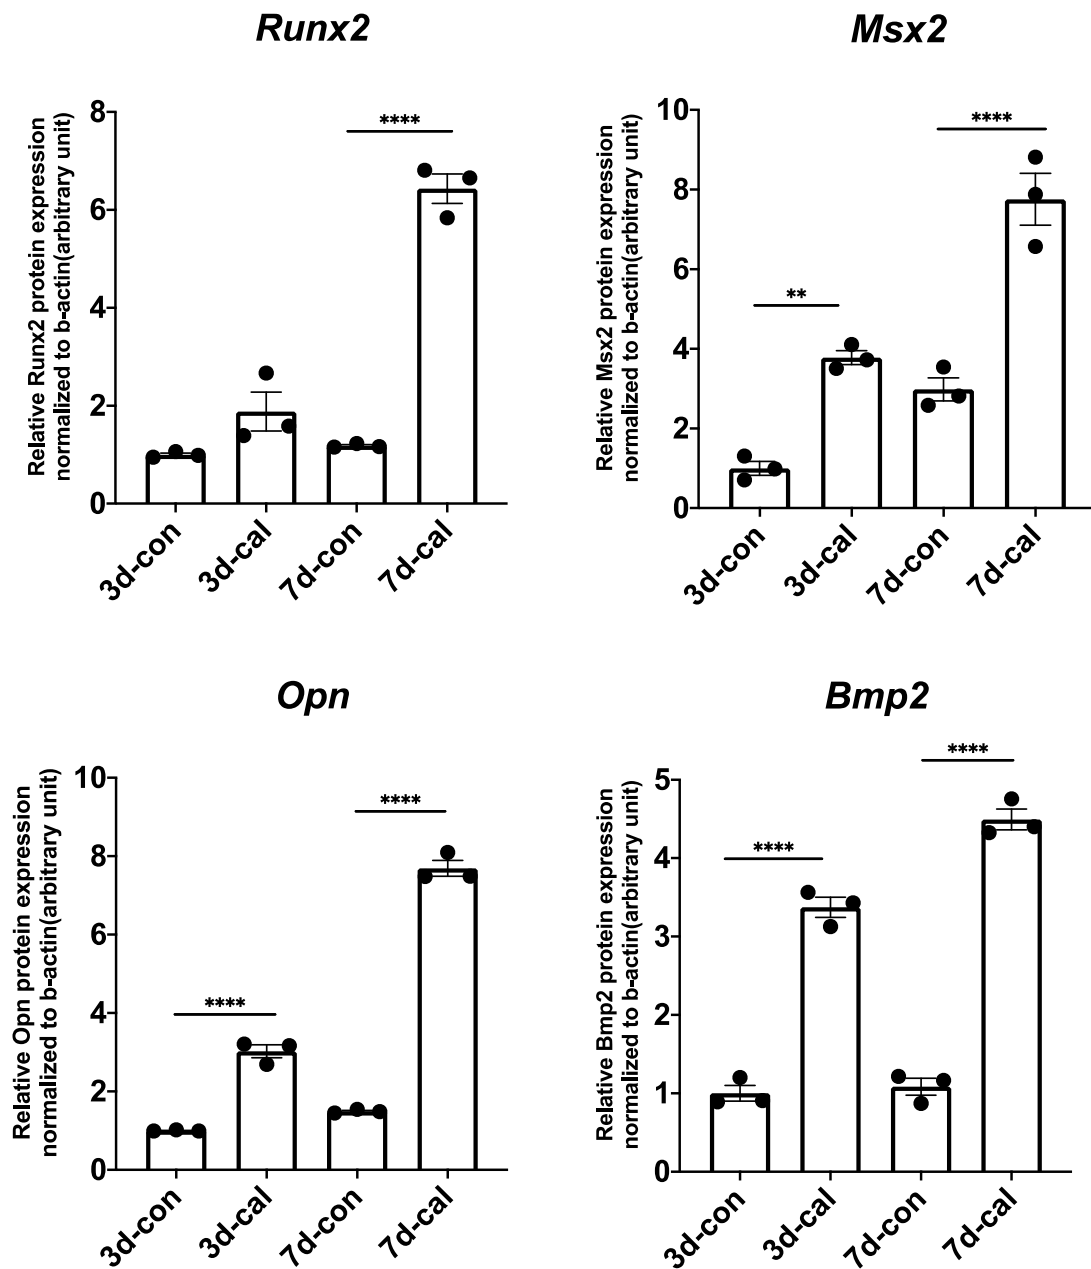

Figure S1. Semi-quantitative analysis of the western blotting data presented in Figure 1I. n=3. Data are presented as mean  $\pm$  SEM, and statistical significance was analyzed by a two-tailed unpaired Student's t-test.

**S2**

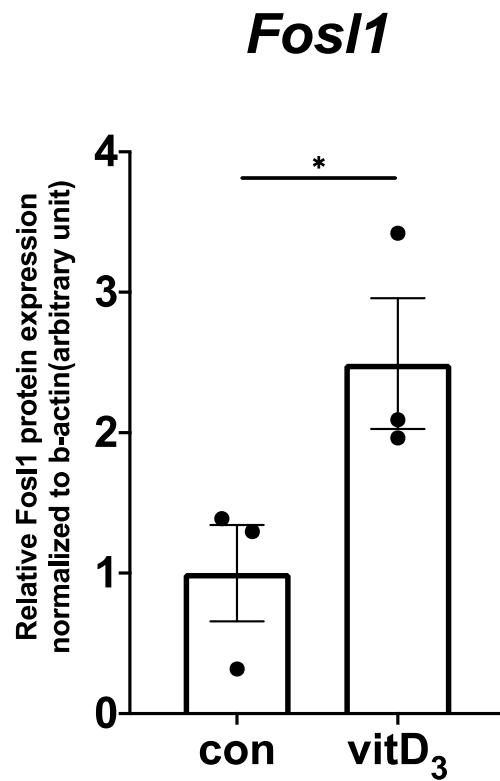

Figure S2.Semi-quantitative analysis of the western blotting data presented in Figure 1L. n=3.Data are presented as mean  $\pm$  SEM, and statistical significance was analyzed by a two-tailed unpaired Student's t-test.

S3

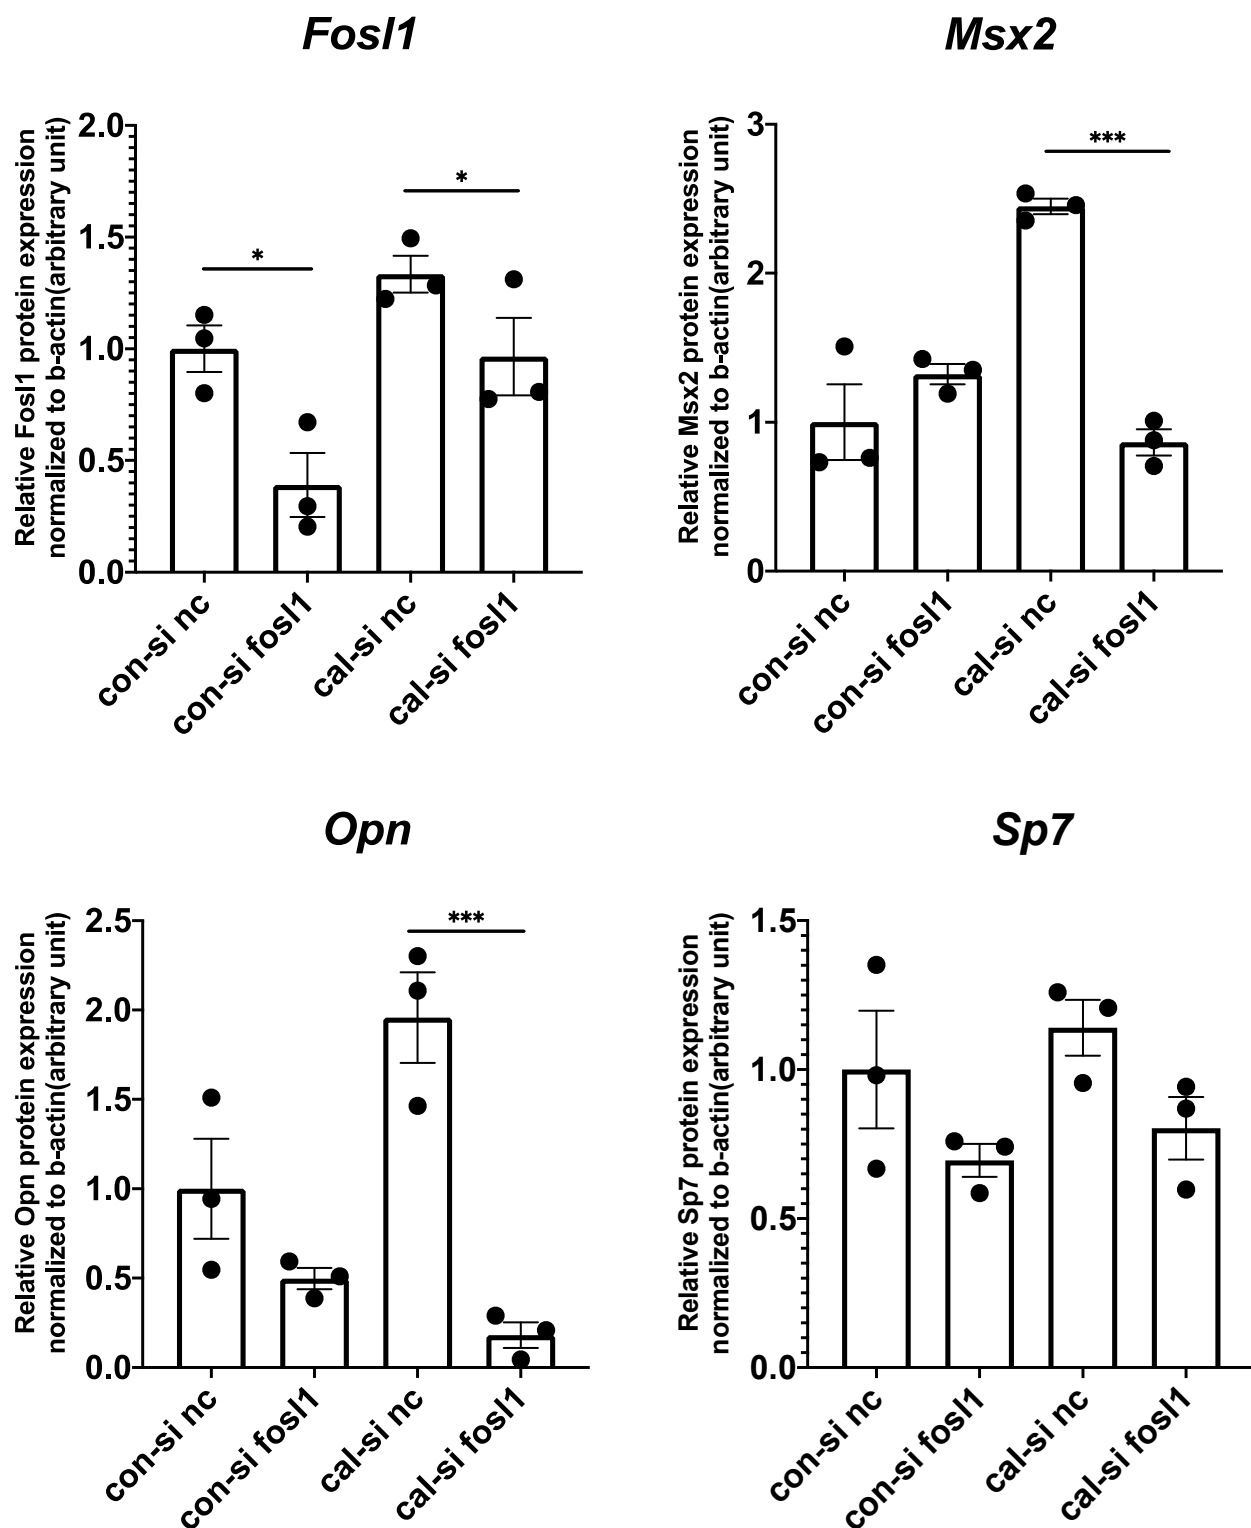

Figure S3.Semi-quantitative analysis of the western blotting data presented in Figure 2E. n=3.Data are presented as mean ±

SEM, and statistical significance was analyzed by a two-tailed unpaired Student's t-test.

## S4

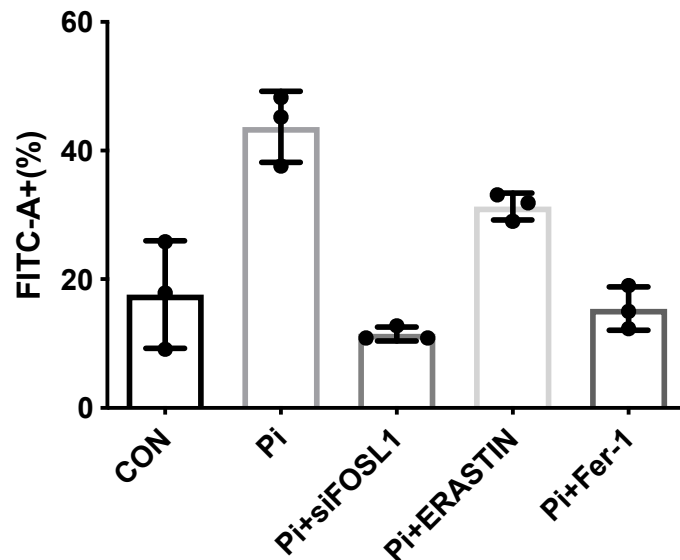

Figure S4. quantitative analysis of the ROS generation data presented in Figure 3D. n=3. Data are presented as mean  $\pm$  SEM, and statistical significance was analyzed by a two-tailed unpaired Student's t-test.

**S5**

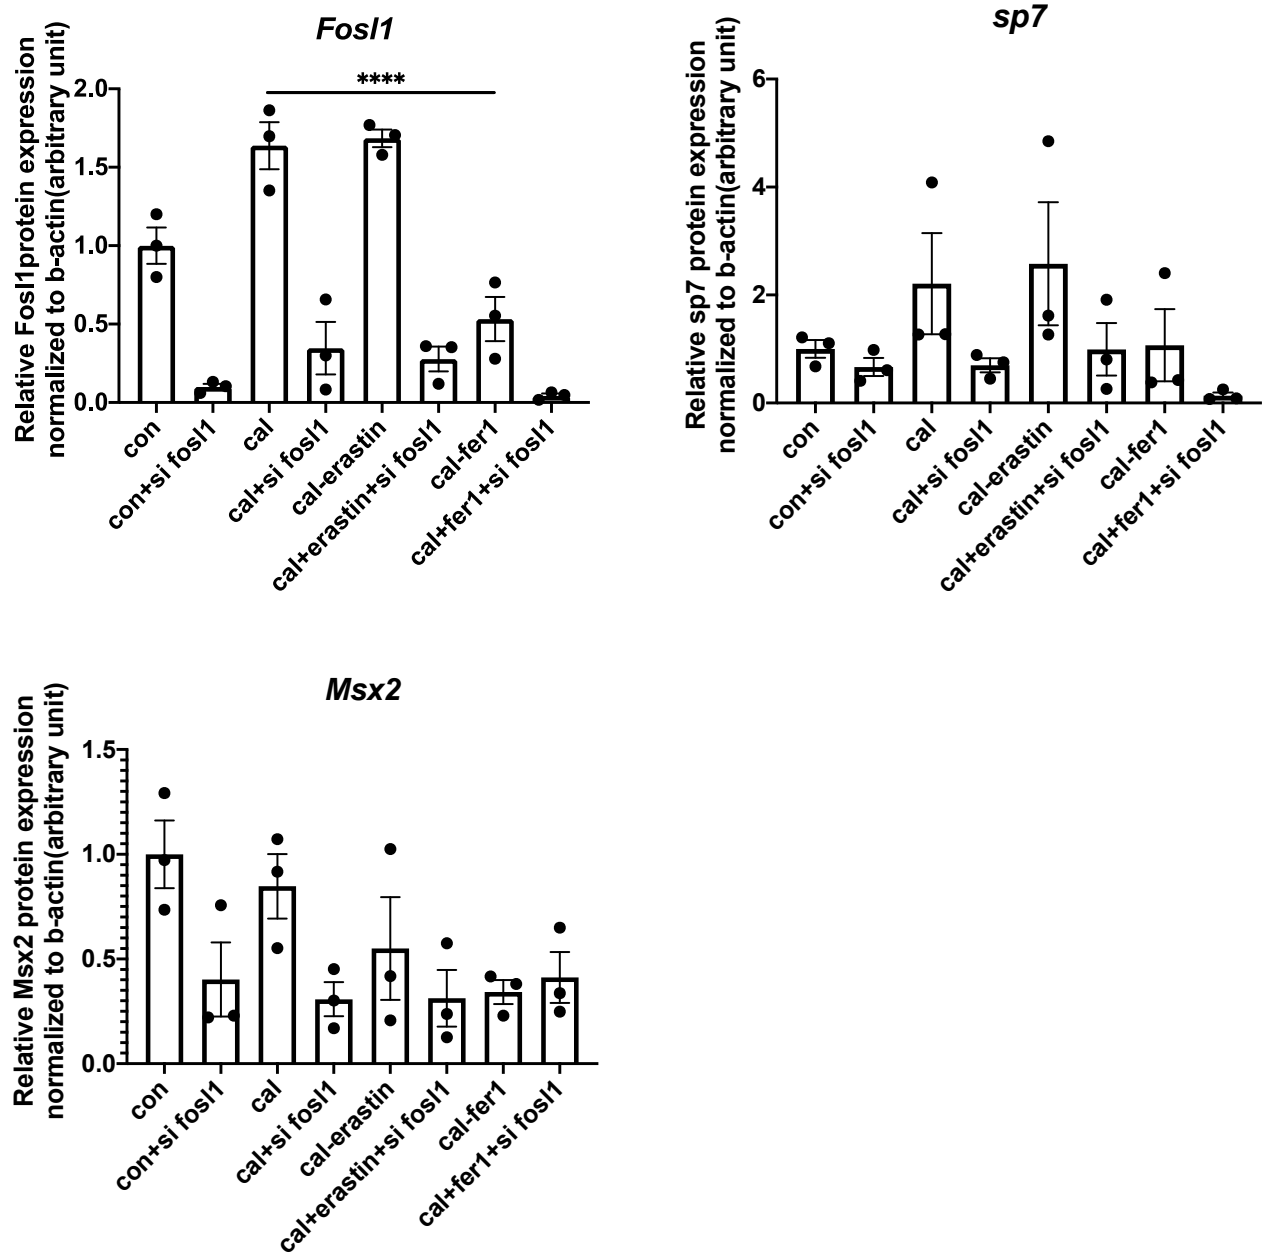

Figure S5. Semi-quantitative analysis of the western blotting data presented in Figure 4D. n=3. Data are presented as mean  $\pm$  SEM, and statistical significance was analyzed by a two-tailed unpaired Student's t-test.

**S6**

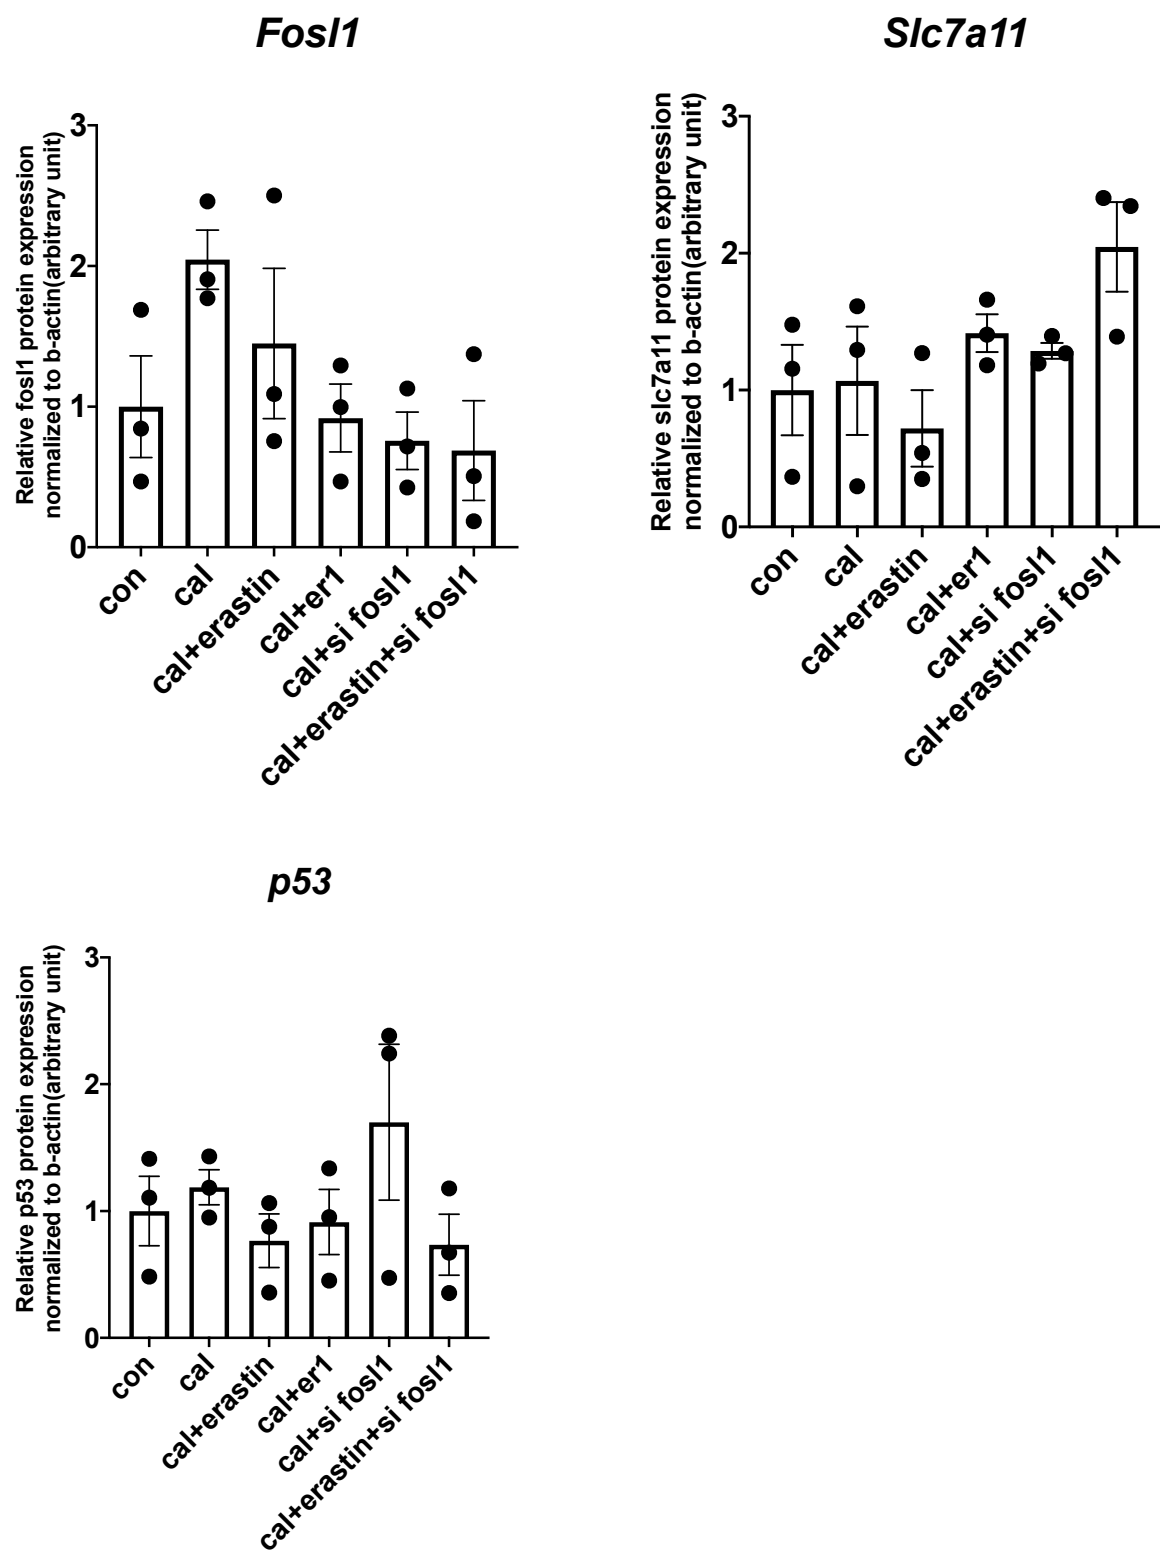

Figure S6.Semi-quantitative analysis of the western blotting data presented in Figure 4D. n=3.Data are presented as mean ±

SEM, and statistical significance was analyzed by a two-tailed unpaired Student's t-test.
